# Supplementary material for: TAPB and RSB protects cardiac diastolic function in elderly patients undergoing abdominopelvic surgery: a retrospective cohort study
Source: PeerJ journal article supplement (doi:10.7717/peerj.9441), 2020-07-02
Supplement: Supplementary_The_images_of_TEE.pdf [file Supplementary_The_images_of_TEE.pdf]

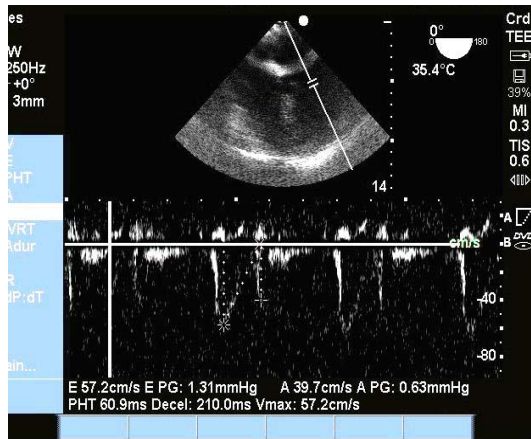

A

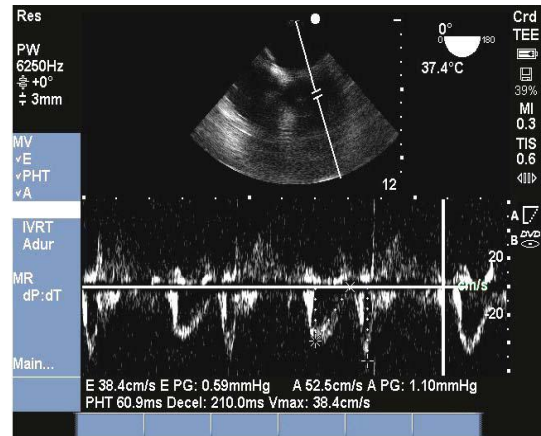

B

S1. Diastolic function (E and A) of the sevoflurane group after anesthesia induction hemodynamic stability (A) and at 1 hour later (B).

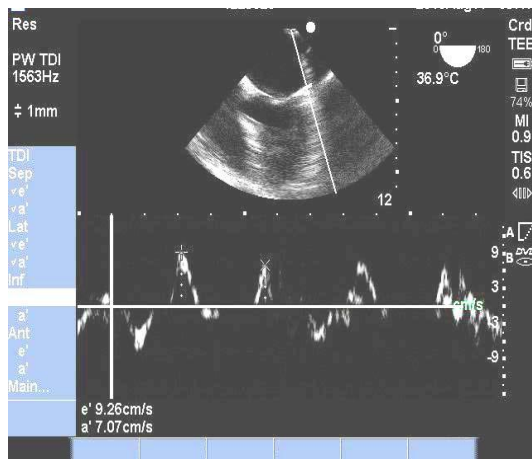

C

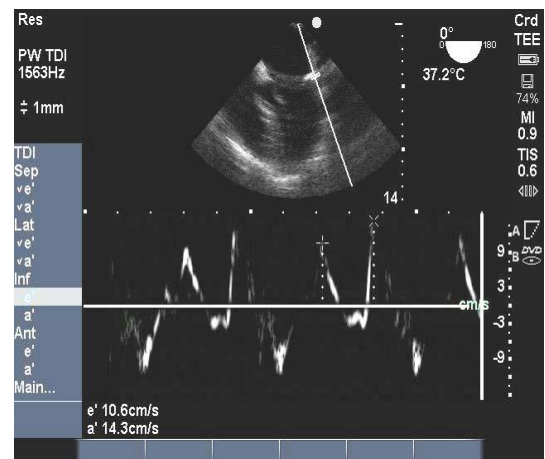

D

S2. Diastolic function (e and a) of the sevoflurane group after anesthesia induction hemodynamic stability (C) and at 1 hour later (D).

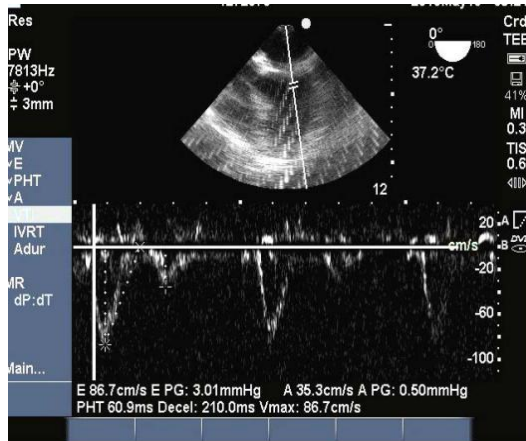

E

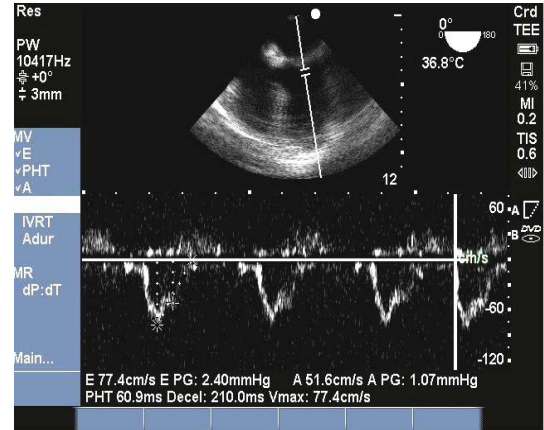

F

S3. Diastolic function (E and A) of the sevoflurane + TAPB and RSB group after anesthesia induction hemodynamic stability (E) and at 1 hour later (F).

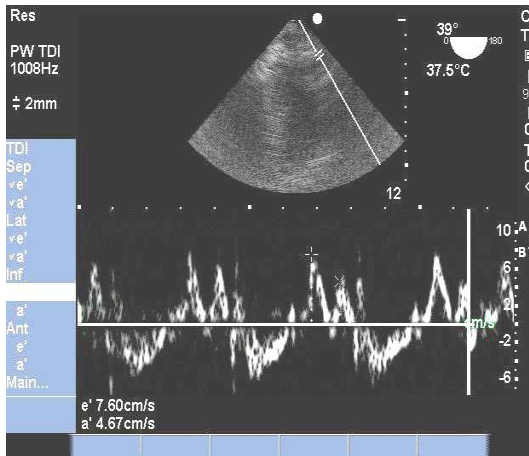

G

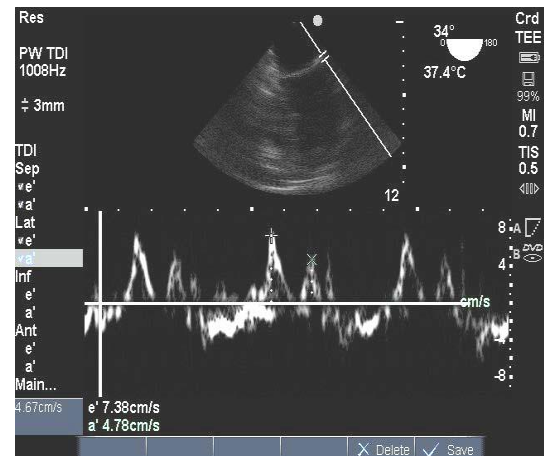

H

S4. Diastolic function (e and a) of the sevoflurane + TAPB and RSB group after anesthesia induction hemodynamic stability (G) and at 1 hour later (H).
